# Supplementary material for: Sensitive and reproducible gold nanostar@metal–organic framework-based SERS membranes for the online monitoring of the freshness of shrimps
Source: Royal Society of Chemistry journal article supplement (doi:10.1039/d3an00147d), 2023-01-01
Supplement: d3an00147d1.pdf [file d3an00147d1.pdf]

**Sensitive and reproducible gold nanostar@metal-organic  
framework based SERS membrane for on-line monitoring the  
freshness of shrimp**

Hanlin Guoa,b, Yu Lia,b, Fuwei Pia,b

<sup>a</sup> State Key Laboratory of Food Science and Technology, School of Food Science and Technology, Jiangnan University, Wuxi, Jiangsu 214122, People's Republic of China

<sup>b</sup> College of Food Science and Engineering, Wuhan Polytechnic University, Wuhan, Hubei 430023, People's Republic of China

E-mail: pifuwei@jiangnan.edu.cn (F. PI.); Tel.: +86-510-85912330

**Synthesis of gold seeds.** All glassware was first cleaned with detergent, followed by aqua regia, and carefully rinsed with MilliQ water and acetone to guarantee an extremely cleaned glass surface. The seed AuNPs was first synthesized by adding a mixture of 3.5 mL of 60 mM sodium citrate and 1.5 mL of 60 mM citric acid to 144 mL of boiling MilliQ water and heating continuously for 30 min. Then 0.1 mL of 30 mM ethylenediaminetetraacetic acid and 1 mL aqueous solution of 25 mM hydrogen tetrachloroaurate (III) ( $\text{HAuCl}_4$ ) were added quickly. After 60 s, the color of the mixture changed from pale yellow to dark blue and then to wine-red, indicating the growth of the Au NPs. The heating was then turned off, but magnetic stirring was continued. When the solution temperature dropped to 95°C, the reaction was interrupted by immersing the flask in ice water, and Au NPs seeds with an average core diameter of ca. 13 nm were obtained.

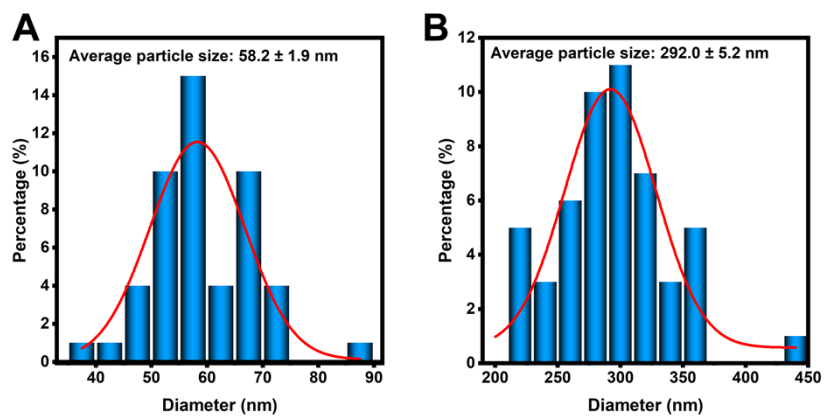

**Figure S1.** Size distribution histograms of AuNSs (A) and AuNS@ZIF-8 (B).

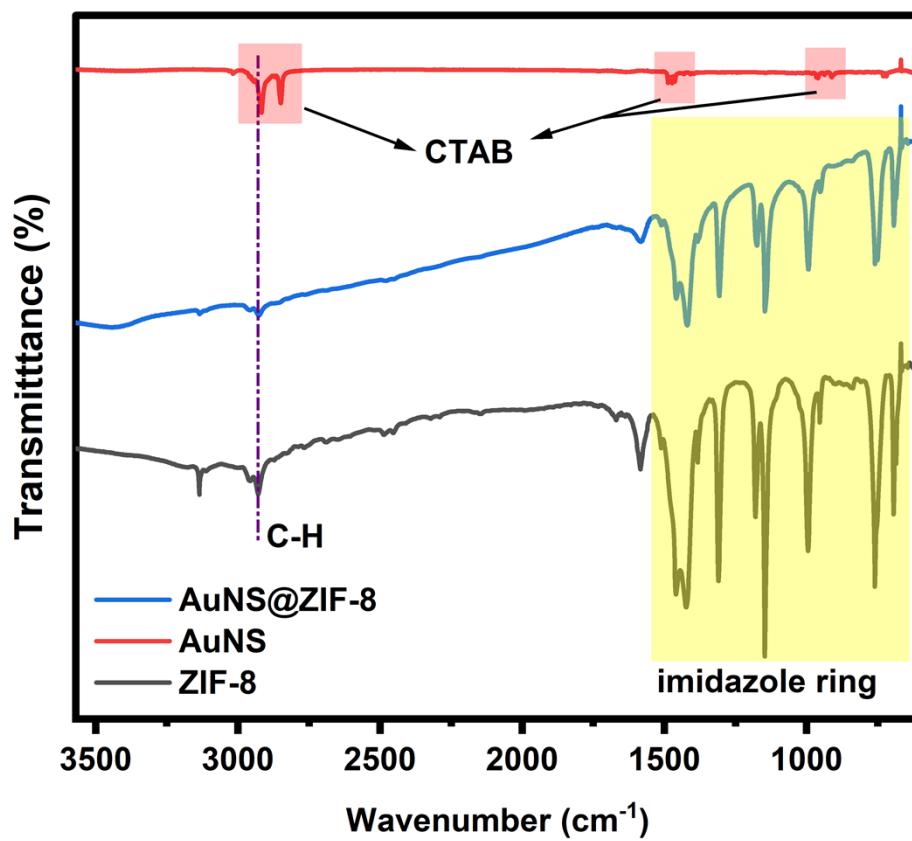

Figure S2. FTIR pattern of AuNS, ZIF-8, AuNS@ZIF-8.

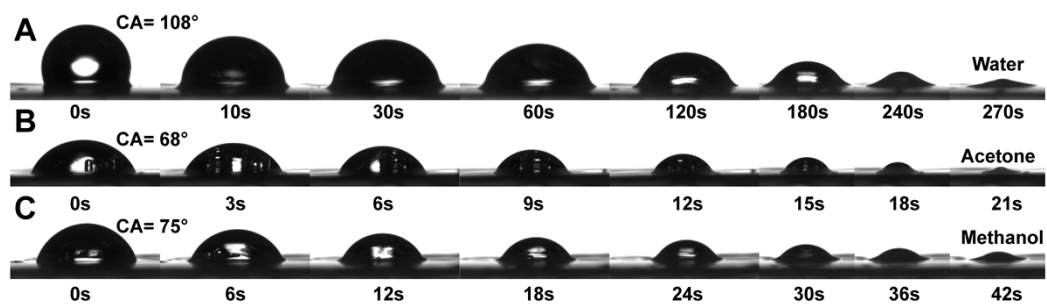

**Figure S3.** Evolution of contact angle images for different solvents during evaporation. (A) water; (B) acetone; (C) methanol.

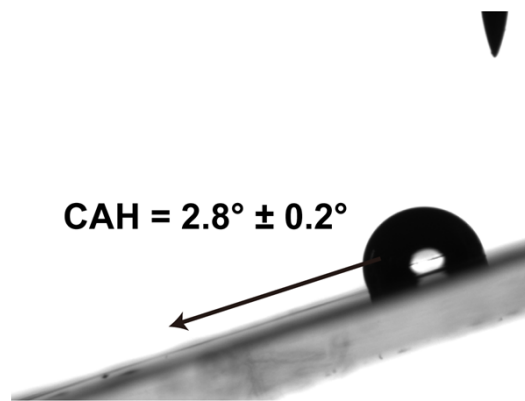

**Figure S4.** A water droplet (5  $\mu$ L) slides on the SLIPS substrate.

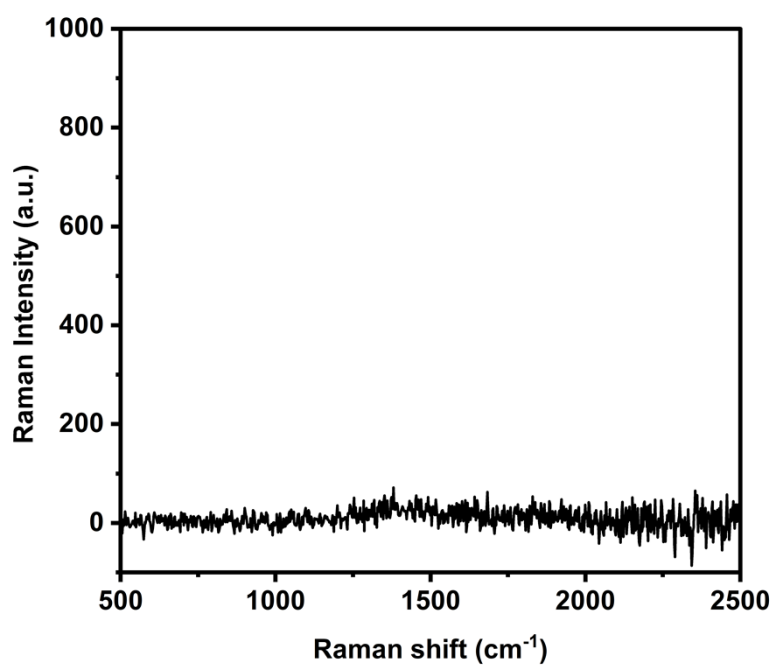

**Figure S5.** The Raman spectrum of the SLIPS substrate.

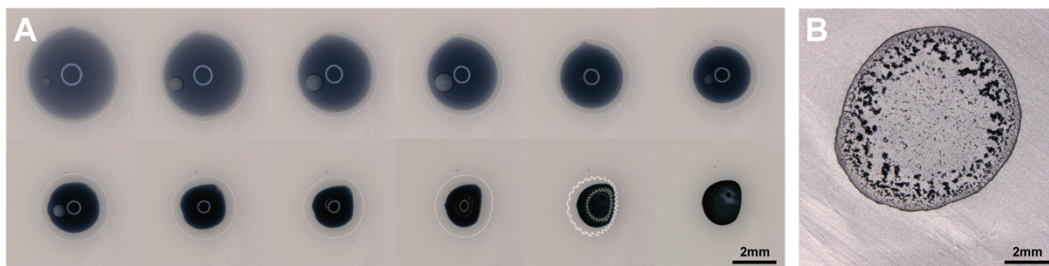

**Figure S6.** (A) The entire evaporation processes of 20  $\mu\text{L}$  of AuNS@ZIF-8 on the SLIPS substrate; (B) the final aggregated pattern of 20  $\mu\text{L}$  of AuNS@ZIF-8 on the tinfoil. The scale bar represents 2 mm.



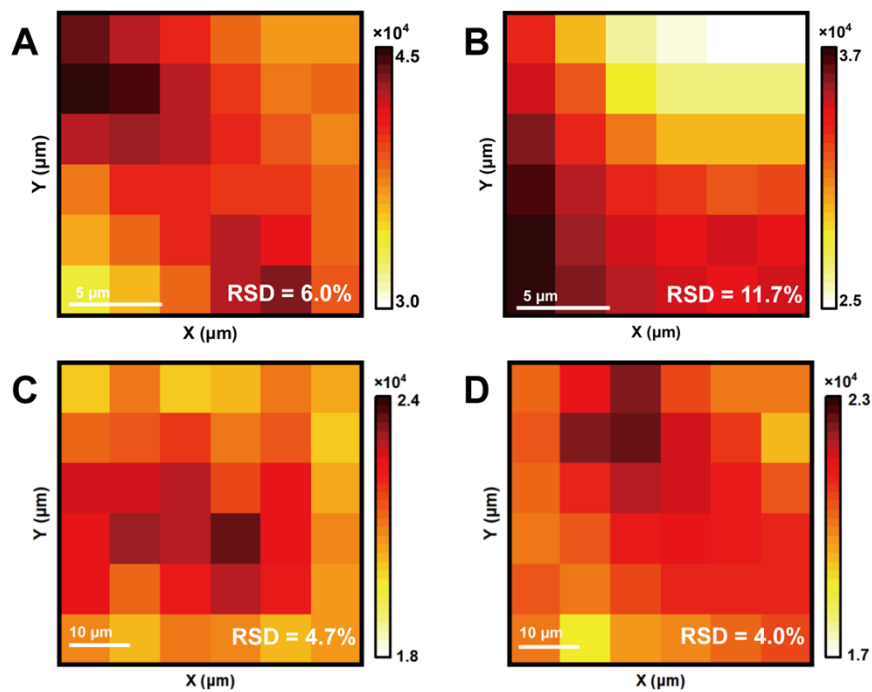

**Figure S7.** The SERS mapping results of the  $1329\text{ cm}^{-1}$  SERS peak from 500 nM 4-NBT when using AuNS@ZIF-8s (A) and AuNSs (B) on the tinfoil; (C)(D)The SERS mapping results at different positions when increasing the scanning range to  $50\text{ }\mu\text{m} \times 50\text{ }\mu\text{m}$  and using AuNS@ZIF-8-SLIPS.

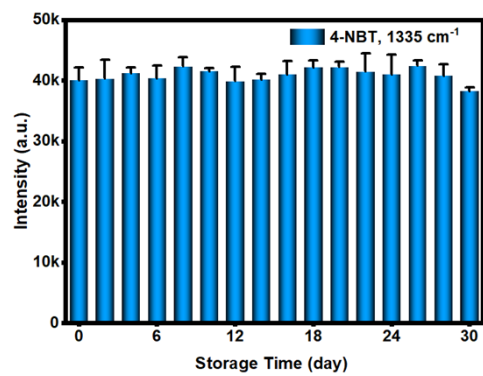

**Figure S8.** The variation of intensities at 1335 cm<sup>-1</sup> (mean  $\pm$  SD) for different storage time. The dates were collected from the AuNS@ZIF-8 SLIPS substrates in 30 days.

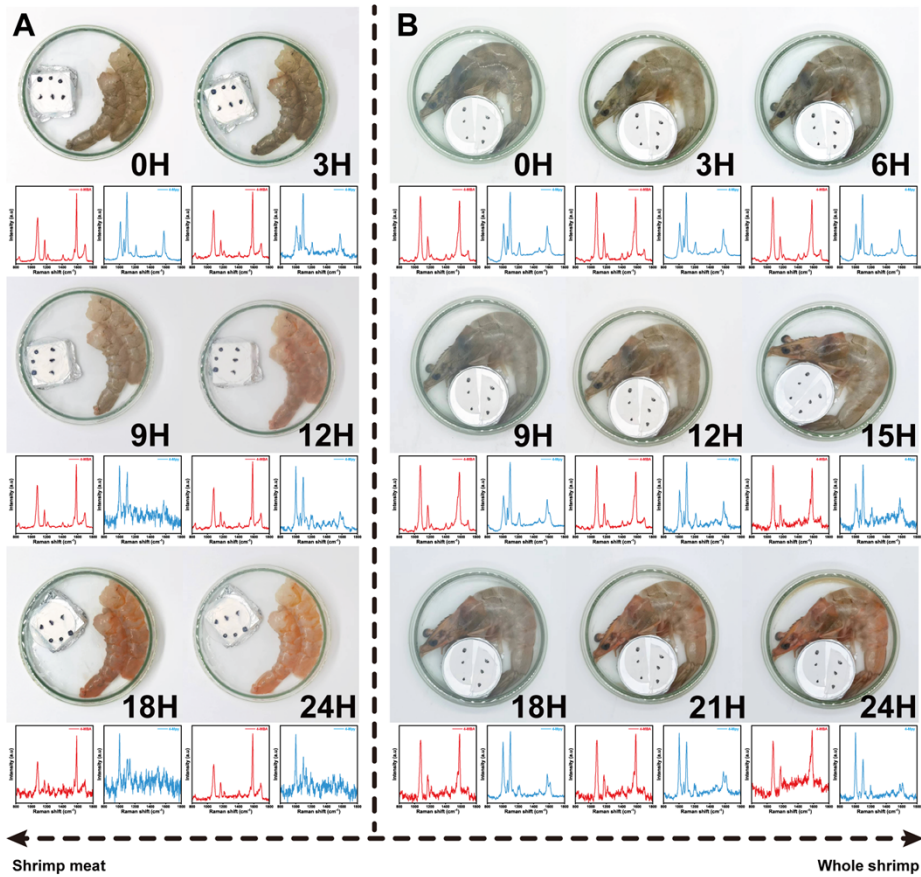

**Figure S9.** The entire photographs and Raman spectra during spoilage processes of shrimp meat (A) and whole shrimp (B) at 25°C. The red and blue curves represent the Raman spectra of 4-MBA and 4-Mpy, respectively.

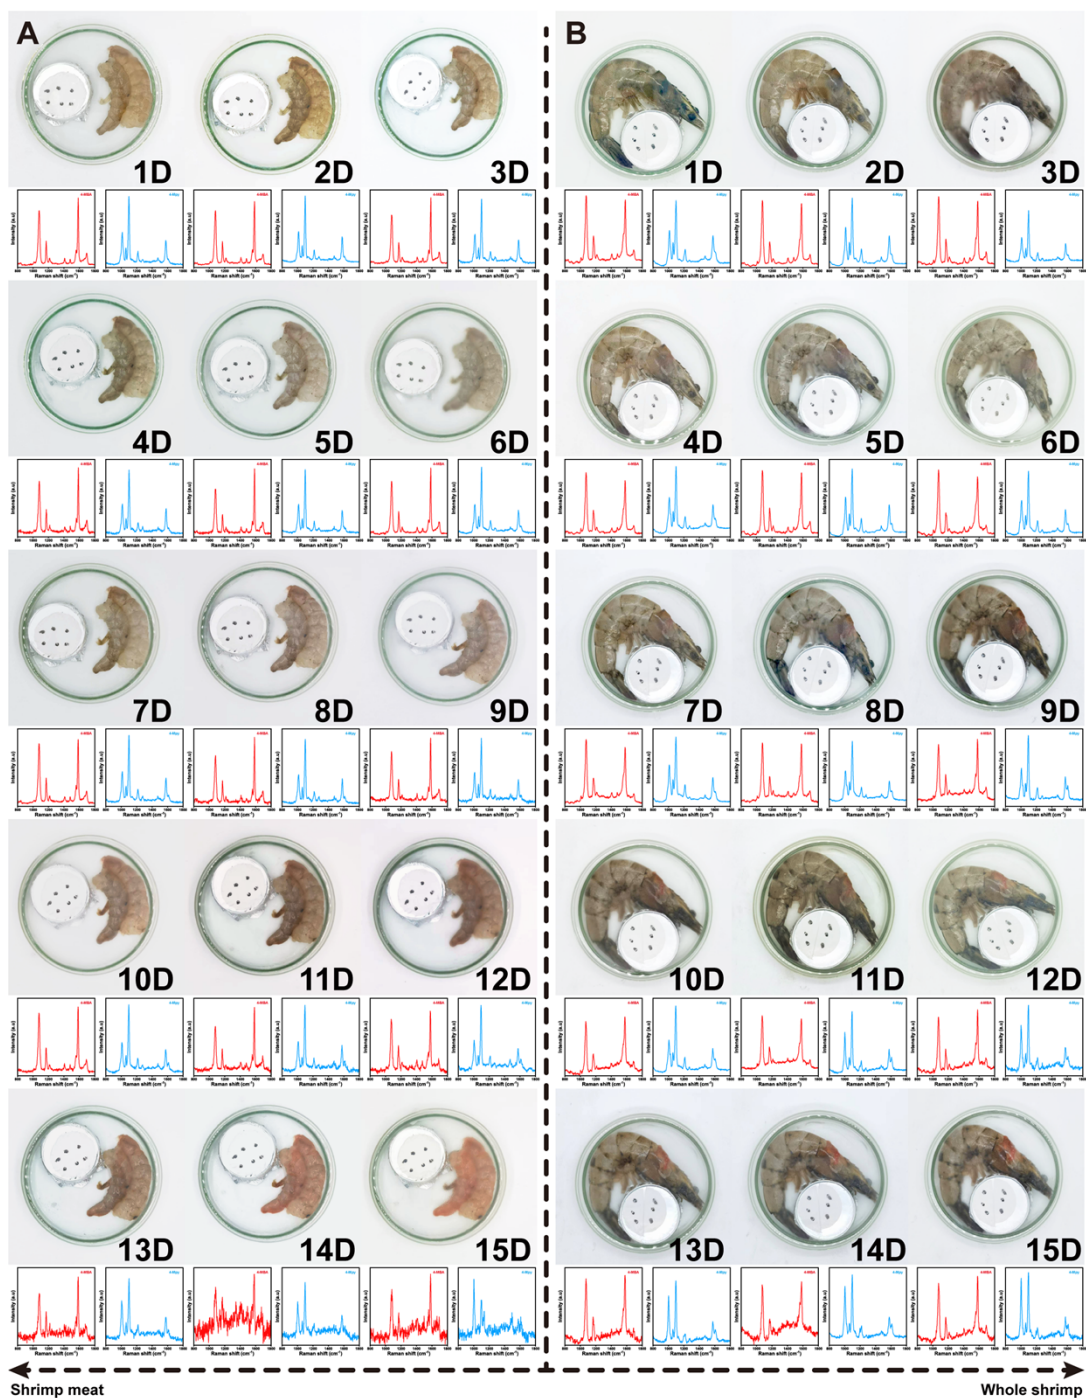

**Figure S10.** The entire photographs and Raman spectra during spoilage processes of shrimp meat (A) and whole shrimp (B) at 4°C. The red and blue curves represent the Raman spectra of 4-MBA and 4-Mpy, respectively.

**Table S1. Assignments for Raman shifts of 4-Mpy<sup>1</sup>**

| Peak (cm <sup>-1</sup> ) | Assignments                   |
|--------------------------|-------------------------------|
| 1013                     | Ring breathing                |
| 1100                     | Ring breathing/C—S stretching |
| 1577                     | C—C/C=N stretching            |
| 1670                     | C—C/C=C stretching            |

**Table S2. Assignments for Raman shifts of 4-MBA react to putrescine<sup>2</sup>**

| Peak (cm <sup>-1</sup> ) | Assignments                 |
|--------------------------|-----------------------------|
| 1074                     | C—S stretching              |
| 1583                     | C=C stretching              |
| 1638                     | C=N stretching of the imine |

**Table S3. Methods for Putrescine Reported in the Literature**

| Methods                | Linear range                                  | LOD                    | Reference<br>s |
|------------------------|-----------------------------------------------|------------------------|----------------|
| Colorimetric sensor    | $2.8 \times 10^{-4}$ - $1.7 \times 10^{-3}$ M | $1.0 \times 10^{-4}$ M | 3              |
| Colorimetric sensor    | $2.8 \times 10^{-6}$ - $1.1 \times 10^{-4}$ M | $6.8 \times 10^{-7}$ M | 4              |
| Chromogenic method     | $1.0 \times 10^{-6}$ - $7.5 \times 10^{-5}$ M | $1.0 \times 10^{-6}$ M | 5              |
| Electrochemical sensor | $2.5 \times 10^{-7}$ - $2.5 \times 10^{-5}$ M | $1.1 \times 10^{-7}$ M | 6              |
| Fluorometric sensor    | 0 - $7.5 \times 10^{-5}$ M                    | $1.9 \times 10^{-6}$ M | 7              |
| SERS sensor            | $1.1 \times 10^{-6}$ - $1.1 \times 10^{-2}$ M | $8.9 \times 10^{-7}$ M | 2              |
| AuNS@ZIF-8 SLIPS       | $1.1 \times 10^{-6}$ - $1.1 \times 10^{-1}$ M | $4.3 \times 10^{-7}$ M | this work      |

## Reference

- 1 S. Kang, W. Nam, W. Zhou, I. Kim and P. J. Vikesland, *ACS Appl. Nano Mater.*, 2021, **4**, 5768–5777.
- 2 H. Kim, B. T. Trinh, K. H. Kim, J. Moon, H. Kang, K. Jo, R. Akter, J. Jeong, E.-K. Lim, J. Jung, H.-S. Choi, H. G. Park, O. S. Kwon, I. Yoon and T. Kang, *Biosens. Bioelectron.*, 2021, **179**, 113063.
- 3 S. Sudalaimani, A. Esokkiya, S. Hansda, C. Suresh, P. Tamilarasan and K. Giribabu, *Food Anal. Methods*, 2020, **13**, 629–636.
- 4 Y.-F. Li, Z.-Z. Lin, C.-Y. Hong and Z.-Y. Huang, *J. Food Meas. Charact.*, 2021, **15**, 1747–1753.
- 5 Y. Sugiyama, H. Ohta, R. Hirano, H. Shimokawa, M. Sakanaka, T. Koyanagi and S. Kurihara, *Anal. Biochem.*, 2020, **593**, 113607.
- 6 J. Sun, Z. Zhang, H. Li, H. Yin, P. Hao, X. Dai, K. Jiang, C. Liu, T. Zhang, J. Yin, Y. Song, W. Zhou and J. Gao, *Anal. Chem.*, 2022, **94**, 5273–5283.
- 7 J. Yan, Q. Fu, S. Zhang, Y. Liu, X. Shi, J. Hou, J. Duan and S. Ai, *Spectrochim. Acta. A. Mol. Biomol. Spectrosc.*, 2022, **282**, 121706.
